# Supplementary material for: Effects of Ag on morphology and catalytic performance of iron catalysts for Fischer–Tropsch synthesis
Source: Royal Society of Chemistry journal article supplement (doi:10.1039/c5ra10105k), 2015-01-01
Supplement: c5ra10105k1.pdf [file c5ra10105k1.pdf]

**Table S1** ICP results of all the catalysts.

| Catalyst                             | Element | Intensity | Calib Units | Sample Conc. Units |
|--------------------------------------|---------|-----------|-------------|--------------------|
|                                      |         |           | (mg/L)      | (mg/L)             |
| Fe <sub>3</sub> O <sub>4</sub>       | Fe      | 4420962.8 | 14.91       | 14.91              |
| 0.5Ag/Fe <sub>3</sub> O <sub>4</sub> | Fe      | 2968109.4 | 9.998       | 9.998              |
|                                      | Ag      | 4119033.8 | 6.600       | 6.600              |
| 0.8Ag/Fe <sub>3</sub> O <sub>4</sub> | Fe      | 2679949.8 | 9.023       | 9.023              |
|                                      | Ag      | 4798372.5 | 7.631       | 7.631              |
| Ag/Fe <sub>3</sub> O <sub>4</sub>    | Fe      | 2292262.3 | 7.712       | 7.712              |
|                                      | Ag      | 5574656.4 | 8.810       | 8.810              |

**Table S2** FT performances of Ag-free, 0.5Ag/Fe<sub>3</sub>O<sub>4</sub>, 0.8Ag/Fe<sub>3</sub>O<sub>4</sub>, and Ag/Fe<sub>3</sub>O<sub>4</sub> catalysts. Catalytic tests were performed at 280 °C, a H<sub>2</sub>/CO ratio of 1, and 20 bar.

| Catalyst                             | Reaction time | Tail gas (mol%) |      | H <sub>2</sub> conversion | CO conversion |
|--------------------------------------|---------------|-----------------|------|---------------------------|---------------|
|                                      | (h)           | H <sub>2</sub>  | CO   | (%)                       | (%)           |
| Ag-free                              | 24            | 21.8            | 1.48 | 81.7                      | 98.8          |
|                                      | 48            | 23.1            | 2.02 | 80.2                      | 98.3          |
|                                      | 72            | 26.8            | 4.38 | 75.9                      | 96.1          |
| 0.5Ag/Fe <sub>3</sub> O <sub>4</sub> | 24            | 30.2            | 3.92 | 71.8                      | 96.3          |
|                                      | 48            | 32.0            | 11.3 | 67.0                      | 88.4          |
|                                      | 72            | 34.7            | 22.1 | 58.6                      | 73.2          |
| 0.8Ag/Fe <sub>3</sub> O <sub>4</sub> | 24            | 29.1            | 3.89 | 73.0                      | 96.4          |
|                                      | 48            | 29.1            | 3.78 | 72.6                      | 96.4          |
|                                      | 72            | 29.8            | 3.59 | 71.7                      | 96.6          |
| Ag/Fe <sub>3</sub> O <sub>4</sub>    | 24            | 30.0            | 11.5 | 69.6                      | 88.4          |
|                                      | 48            | 35.6            | 22.6 | 55.5                      | 71.8          |
|                                      | 72            | 36.7            | 24.0 | 52.2                      | 68.8          |
